# Supplementary material for: A Manganese(II) 3D Metal–Organic Framework with Siloxane-Spaced Dicarboxylic Ligand: Synthesis, Structure, and Properties
Source: MDPI journal article supplement (doi:10.3390/inorganics11010021), 2023-01-01
Supplement: s1 [file s1]

# **A Manganese(II) 3D Metal–Organic Framework with Siloxane-Spaced Dicarboxylic Ligand: Synthesis, Structure, and Properties**

Alexandru-Constantin Stoica,<sup>1</sup> Madalin Damoc,<sup>1</sup> Sergiu Shova,<sup>1</sup> Ghenadie Novitchi,<sup>2</sup> Mihaela Dascalu<sup>1\*</sup> and Maria Cazacu<sup>1\*</sup>

*<sup>1</sup>Department of Inorganic Polymers, “Petru Poni” Institute of Macromolecular Chemistry, Aleea Grigore Ghica Voda 41A, 700487 Iasi, Romania*

*<sup>2</sup>Laboratoire National des Champs Magnétiques Intenses (LNCMI) Université Grenoble Alpes, INSA Toulouse, Université Toulouse Paul Sabatier, EMFL, CNRS, F-38042 Grenoble, France*

\*Correspondence: amihaela@icmpp.ro; mcazacu@icmpp.ro

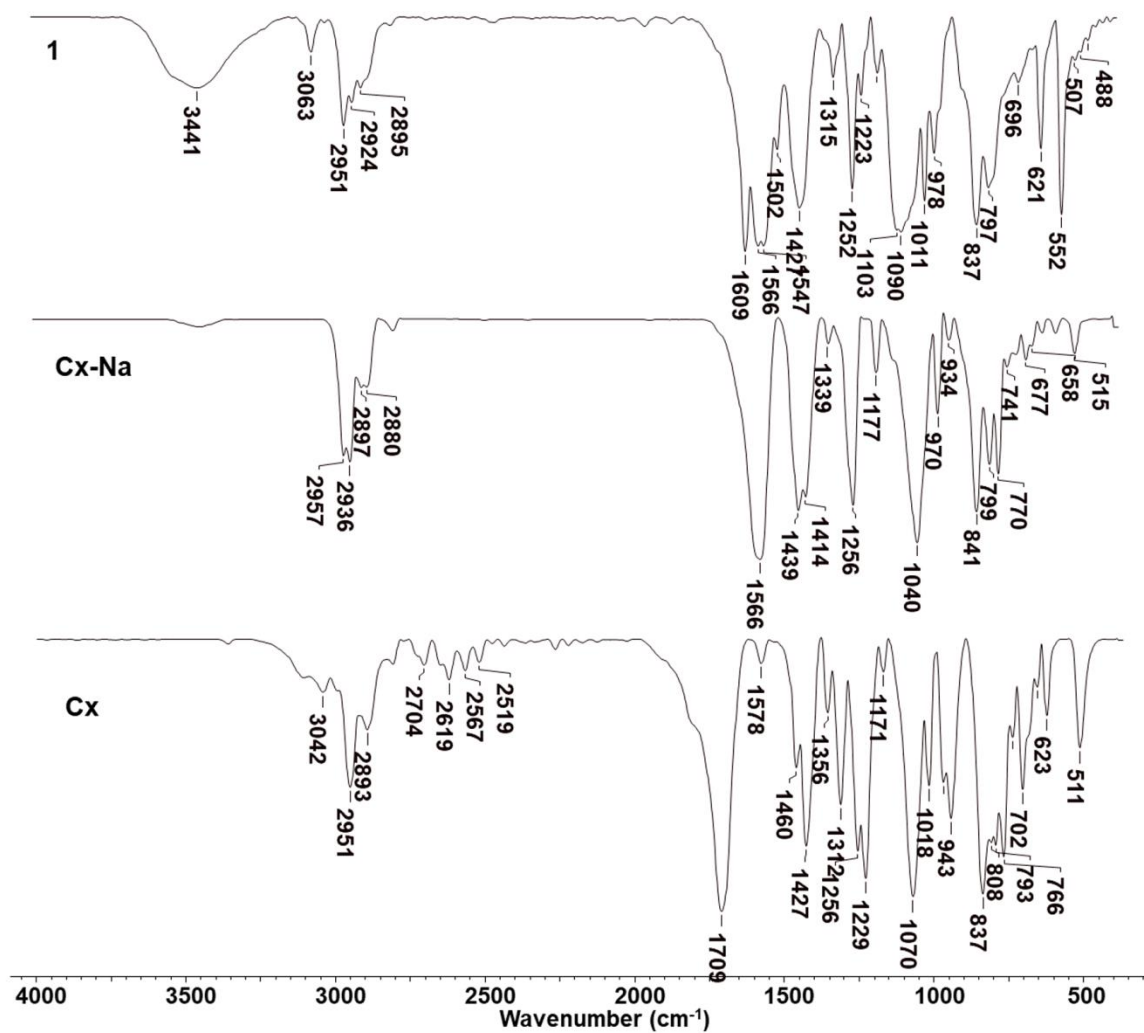

**Figure S1.** FTIR spectra for Cx, Cx-Na, and polymer **1**

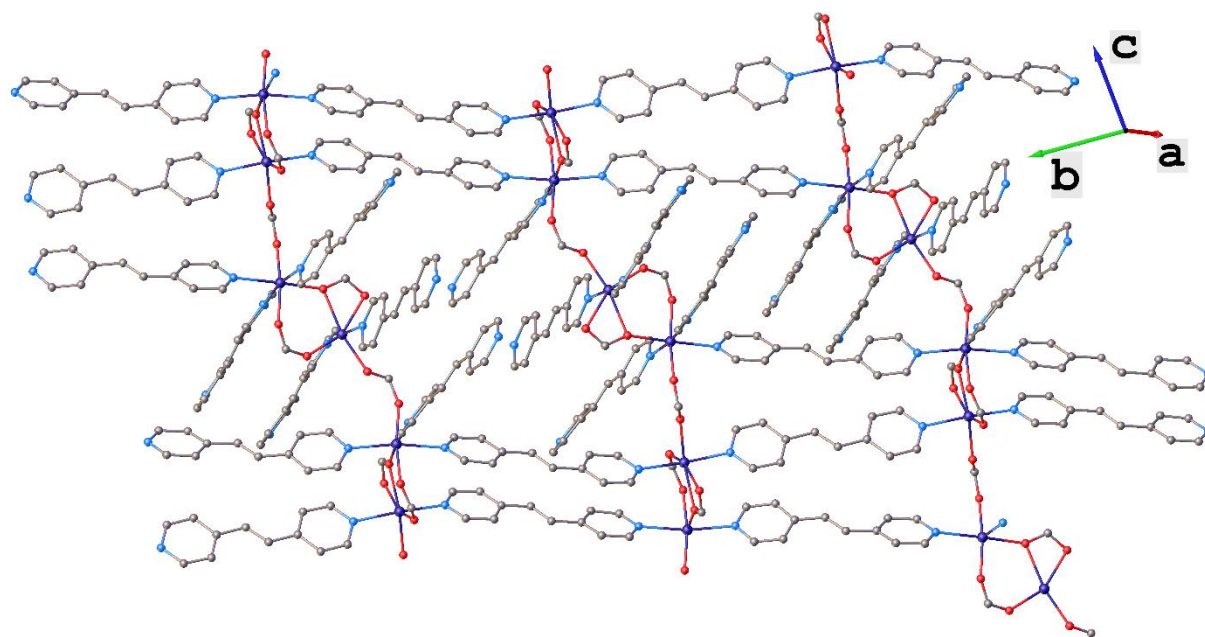

**Figure S2.** Polymer structure, from the perspective of the etdipy moiety (perchlorate counterion and siloxane moiety were omitted for clarity)

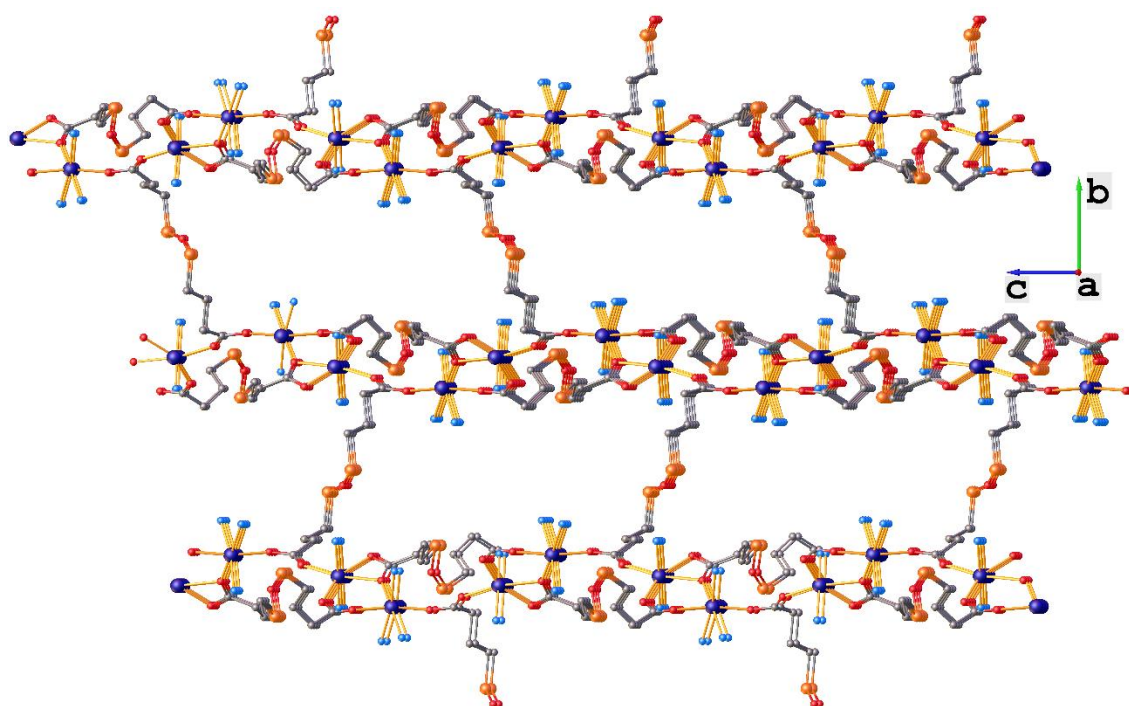

**Figure S3.** Polymer structure from the perspective of the siloxane moiety (perchlorate counterion and etdipy moiety were omitted for clarity)

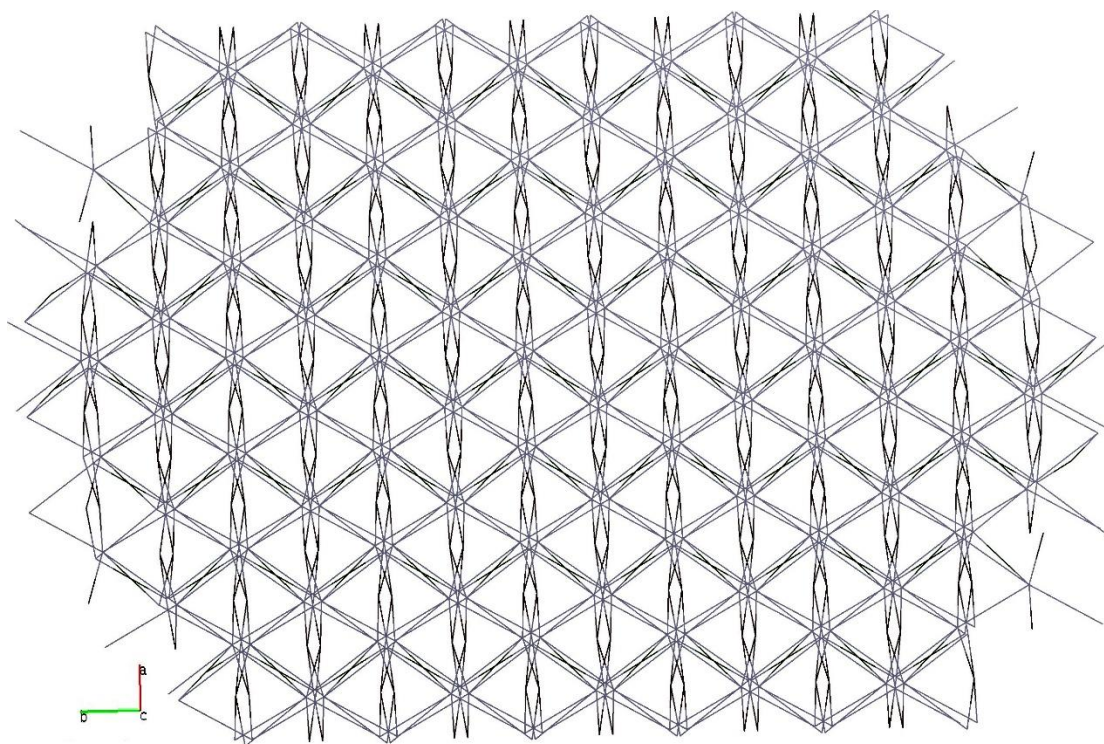

**Figure S4.** Topology of the polymer network. In the topological analysis, the disordered part of the structure was omitted

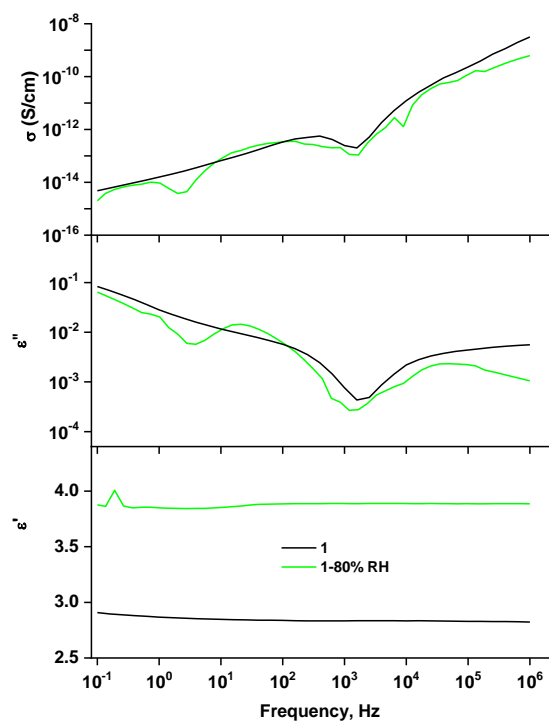

**Figure S5.** Dielectric properties of compound **1**, including the relative permittivity ( $\epsilon'$ ), dielectric loss ( $\epsilon''$ ), and conductivity ( $\sigma$ ).

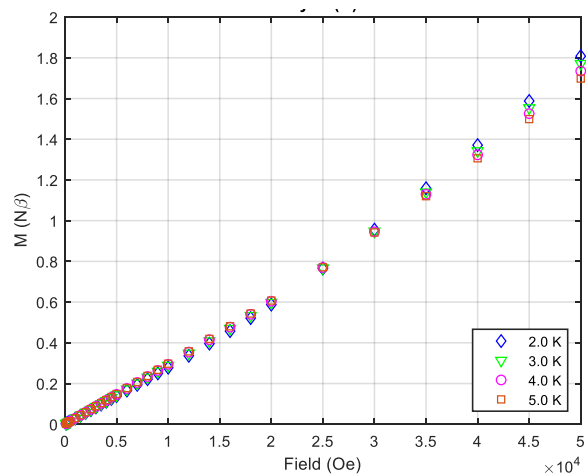

**Figure S6.** Magnetization curves versus applied magnetic field for compound **1**.

$$\chi = \frac{Ng^2\beta^2 S(S+1)}{3kT} * \left[ \frac{1+u_1+u_2+u_1u_2}{1-u_1u_2} \right] \quad \text{eq-SI-1}$$

$$u_i = \coth(J'_i/kT) - kT/J'_i ; \quad J'_i = J_i(S(S+1)); i=1,2 \quad \text{eq-SI-2}$$

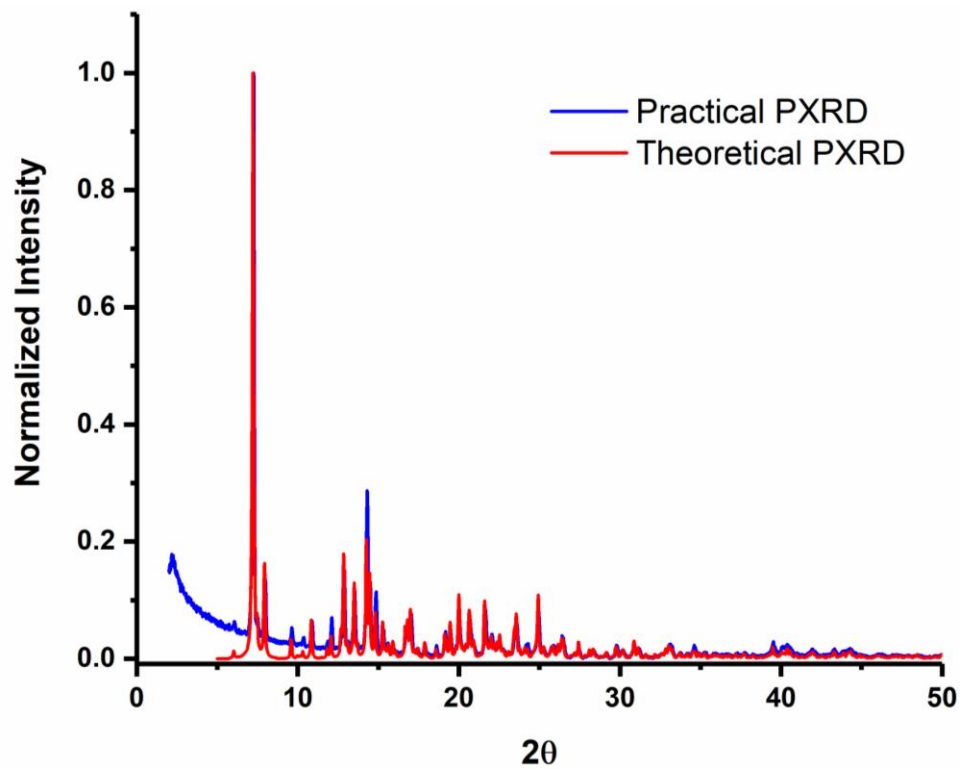

**Figure S7.** PXRD diffractogram (blue) vs. the one simulated based on single crystal X-ray diffraction data (red).

**Table S1.** Selected bond lengths [Å], angles [°] and hydrogen bonds for compound **1**.

|                      |           |                       |           |
|----------------------|-----------|-----------------------|-----------|
| Mn1-O1               | 2.180(4)  | C11-C12               | 1.394(10) |
| Mn1-O5 <sup>1</sup>  | 2.131(5)  | C13-C14               | 1.507(8)  |
| Mn1-O6               | 2.107(5)  | C24-C23               | 1.497(8)  |
| Mn1-N1 <sup>2</sup>  | 2.295(5)  | C25-C26               | 1.509(8)  |
| Mn1-N2               | 2.302(5)  | C31-C32               | 1.377(9)  |
| Mn1-N3 <sup>3</sup>  | 2.322(5)  | C31-C35               | 1.399(10) |
| Mn2-O1 <sup>4</sup>  | 2.291(4)  | C33-C34               | 1.367(9)  |
| Mn2-O2 <sup>4</sup>  | 2.255(5)  | C34-C35               | 1.364(10) |
| Mn2-O4 <sup>5</sup>  | 2.093(5)  | C35-C36               | 1.488(9)  |
| Mn2-O7               | 2.109(4)  | C36-C37               | 1.278(10) |
| Mn2-N4               | 2.280(5)  | C37-C38               | 1.472(9)  |
| Mn2-N5               | 2.265(5)  | C38-C39               | 1.403(10) |
| O1-Mn2 <sup>6</sup>  | 2.291(4)  | C38-C42               | 1.359(10) |
| O1-C13               | 1.292(8)  | C39-C40               | 1.391(9)  |
| O2-Mn2 <sup>6</sup>  | 2.255(5)  | C41-C42               | 1.372(9)  |
| O2-C13               | 1.251(7)  | C43-C44               | 1.368(10) |
| O4-Mn2 <sup>7</sup>  | 2.093(5)  | C44-C45               | 1.371(10) |
| O4-C24               | 1.259(8)  | C45-C46               | 1.368(10) |
| O5-Mn1 <sup>8</sup>  | 2.131(5)  | C45-C48               | 1.485(9)  |
| O5-C24               | 1.242(7)  | C46-C47               | 1.385(9)  |
| O6-C25               | 1.260(7)  | C48-C48 <sup>11</sup> | 1.302(13) |
| O7-C25               | 1.237(7)  | Si1-O3                | 1.606(9)  |
| N1-Mn1 <sup>9</sup>  | 2.295(5)  | Si1-C16               | 1.837(12) |
| N1-C2                | 1.341(9)  | Si1-C17               | 1.833(12) |
| N1-C3                | 1.310(9)  | Si1-C18               | 1.824(12) |
| N2-C10               | 1.328(9)  | Si2-O3                | 1.606(9)  |
| N2-C11               | 1.311(9)  | Si2-C19               | 1.826(12) |
| N3-Mn1 <sup>10</sup> | 2.322(5)  | Si2-C20               | 1.830(12) |
| N3-C32               | 1.328(9)  | Si2-C21               | 1.832(11) |
| N3-C33               | 1.323(8)  | Si3-O8                | 1.608(10) |
| N4-C40               | 1.339(8)  | Si3-C28               | 1.87(2)   |
| N4-C41               | 1.335(9)  | Si3-C29               | 1.88(2)   |
| N5-C43               | 1.348(9)  | Si3-C30               | 1.67(3)   |
| N5-C47               | 1.332(8)  | C14-C15               | 1.504(9)  |
| C1-C2                | 1.372(9)  | C15-C16               | 1.500(9)  |
| C1-C5                | 1.376(10) | C21-C22               | 1.426(13) |
| C3-C4                | 1.386(10) | C22-C23               | 1.434(14) |
| C4-C5                | 1.362(10) | C26-C27               | 1.592(19) |
| C5-C6                | 1.454(9)  | C27-C28               | 1.53(2)   |
| C6-C7                | 1.306(10) | Cl1-O9                | 1.366(9)  |

|        |           |         |           |
|--------|-----------|---------|-----------|
| C7-C8  | 1.467(9)  | Cl1-O10 | 1.493(11) |
| C8-C9  | 1.365(10) | Cl1-O11 | 1.390(9)  |
| C8-C12 | 1.340(10) | Cl1-O12 | 1.389(8)  |
| C9-C10 | 1.388(10) |         |           |

<sup>1</sup>  $-1+x, \frac{1}{2}-y, -\frac{1}{2}+z$ ; <sup>2</sup>  $-x, -\frac{1}{2}+y, \frac{1}{2}-z$ ; <sup>3</sup>  $1-x, \frac{1}{2}+y, \frac{1}{2}-z$ ; <sup>4</sup>  $+x, \frac{1}{2}-y, \frac{1}{2}+z$ ; <sup>5</sup>  $-1+x, +y, +z$ ; <sup>6</sup>  $+x, \frac{1}{2}-y, -\frac{1}{2}+z$ ; <sup>7</sup>  $1+x, +y, +z$ ; <sup>8</sup>  $1+x, \frac{1}{2}-y, \frac{1}{2}+z$ ; <sup>9</sup>  $-x, \frac{1}{2}+y, \frac{1}{2}-z$ ; <sup>10</sup>  $1-x, -\frac{1}{2}+y, \frac{1}{2}-z$ ; <sup>11</sup>  $-x, 1-y, 1-z$

|                                      |            |             |           |
|--------------------------------------|------------|-------------|-----------|
| O1-Mn1-N1 <sup>1</sup>               | 89.10(18)  | C8-C12-C11  | 121.3(8)  |
| O1-Mn1-N2                            | 174.82(17) | O1-C13-C14  | 117.9(8)  |
| O1-Mn1-N3 <sup>2</sup>               | 86.70(18)  | O2-C13-O1   | 118.2(6)  |
| O5 <sup>3</sup> -Mn1-O1              | 94.29(17)  | O2-C13-C14  | 122.5(8)  |
| O5 <sup>3</sup> -Mn1-N1 <sup>1</sup> | 85.43(19)  | O4-C24-C23  | 115.4(11) |
| O5 <sup>3</sup> -Mn1-N2              | 86.3(2)    | O5-C24-O4   | 125.3(6)  |
| O5 <sup>3</sup> -Mn1-N3 <sup>2</sup> | 86.86(19)  | O5-C24-C23  | 119.3(11) |
| O6-Mn1-O1                            | 89.37(17)  | O6-C25-C26  | 119.1(8)  |
| O6-Mn1-O5 <sup>3</sup>               | 171.23(17) | O7-C25-O6   | 122.6(6)  |
| O6-Mn1-N1 <sup>1</sup>               | 102.62(19) | O7-C25-C26  | 116.7(8)  |
| O6-Mn1-N2                            | 89.3(2)    | C32-C31-C35 | 119.2(7)  |
| O6-Mn1-N3 <sup>2</sup>               | 85.40(19)  | N3-C32-C31  | 123.4(8)  |
| N1 <sup>1</sup> -Mn1-N2              | 96.08(19)  | N3-C33-C34  | 124.0(7)  |
| N1 <sup>1</sup> -Mn1-N3 <sup>2</sup> | 170.9(2)   | C35-C34-C33 | 120.2(7)  |
| N2-Mn1-N3 <sup>2</sup>               | 88.19(19)  | C31-C35-C36 | 124.8(7)  |
| O2 <sup>4</sup> -Mn2-O1 <sup>4</sup> | 57.37(15)  | C34-C35-C31 | 116.6(6)  |
| O2 <sup>4</sup> -Mn2-N4              | 87.51(18)  | C34-C35-C36 | 118.6(7)  |
| O2 <sup>4</sup> -Mn2-N5              | 89.4(2)    | C37-C36-C35 | 127.3(8)  |
| O4 <sup>5</sup> -Mn2-O1 <sup>4</sup> | 97.73(17)  | C36-C37-C38 | 125.8(9)  |
| O4 <sup>5</sup> -Mn2-O2 <sup>4</sup> | 154.83(18) | C39-C38-C37 | 121.2(7)  |
| O4 <sup>5</sup> -Mn2-O7              | 93.41(18)  | C42-C38-C37 | 121.6(7)  |
| O4 <sup>5</sup> -Mn2-N4              | 92.18(19)  | C42-C38-C39 | 117.2(6)  |
| O4 <sup>5</sup> -Mn2-N5              | 93.7(2)    | C40-C39-C38 | 119.2(7)  |
| O7-Mn2-O1 <sup>4</sup>               | 168.14(17) | N4-C40-C39  | 123.1(7)  |
| O7-Mn2-O2 <sup>4</sup>               | 111.70(17) | N4-C41-C42  | 124.4(7)  |
| O7-Mn2-N4                            | 87.41(18)  | C38-C42-C41 | 120.0(7)  |
| O7-Mn2-N5                            | 87.08(18)  | N5-C43-C44  | 123.7(7)  |
| N4-Mn2-O1 <sup>4</sup>               | 96.19(17)  | C43-C44-C45 | 120.1(7)  |
| N5-Mn2-O1 <sup>4</sup>               | 88.15(18)  | C44-C45-C48 | 119.9(7)  |
| N5-Mn2-N4                            | 172.2(2)   | C46-C45-C44 | 117.1(6)  |
| Mn1-O1-Mn2 <sup>6</sup>              | 119.16(19) | C46-C45-C48 | 123.0(6)  |
| C13-O1-Mn1                           | 149.8(4)   | C45-C46-C47 | 119.8(7)  |
| C13-O1-Mn2 <sup>6</sup>              | 90.9(3)    | N5-C47-C46  | 123.7(7)  |

|                          |          |                            |           |
|--------------------------|----------|----------------------------|-----------|
| C13-O2-Mn2 <sup>6</sup>  | 93.6(4)  | C48 <sup>11</sup> -C48-C45 | 124.3(9)  |
| C24-O4-Mn2 <sup>7</sup>  | 135.2(4) | O3-Si1-C16                 | 89.7(11)  |
| C24-O5-Mn1 <sup>8</sup>  | 138.4(5) | O3-Si1-C17                 | 124.8(17) |
| C25-O6-Mn1               | 144.8(4) | O3-Si1-C18                 | 104.5(17) |
| C25-O7-Mn2               | 134.8(4) | C17-Si1-C16                | 113(2)    |
| C2-N1-Mn1 <sup>9</sup>   | 119.6(5) | C18-Si1-C16                | 118(2)    |
| C3-N1-Mn1 <sup>9</sup>   | 124.2(5) | C18-Si1-C17                | 106(2)    |
| C3-N1-C2                 | 116.1(6) | O3-Si2-C19                 | 105.1(15) |
| C10-N2-Mn1               | 119.4(5) | O3-Si2-C20                 | 99.8(17)  |
| C11-N2-Mn1               | 124.4(5) | O3-Si2-C21                 | 117.4(12) |
| C11-N2-C10               | 115.8(6) | C19-Si2-C20                | 118(2)    |
| C32-N3-Mn1 <sup>10</sup> | 125.6(5) | C19-Si2-C21                | 113.6(18) |
| C33-N3-Mn1 <sup>10</sup> | 117.8(4) | C20-Si2-C21                | 102.7(17) |
| C33-N3-C32               | 116.6(6) | O8-Si3-C28                 | 105.1(15) |
| C40-N4-Mn2               | 116.3(5) | O8-Si3-C29                 | 110.5(13) |
| C41-N4-Mn2               | 127.1(4) | O8-Si3-C30                 | 116.5(14) |
| C41-N4-C40               | 116.1(5) | C28-Si3-C29                | 102.8(14) |
| C43-N5-Mn2               | 118.8(4) | C30-Si3-C28                | 111.2(15) |
| C47-N5-Mn2               | 125.6(5) | C30-Si3-C29                | 109.8(15) |
| C47-N5-C43               | 115.5(6) | Si2-O3-Si1                 | 143.4(15) |
| C2-C1-C5                 | 120.4(7) | C15-C14-C13                | 111.5(12) |
| N1-C2-C1                 | 123.3(8) | C16-C15-C14                | 121.3(15) |
| N1-C3-C4                 | 123.6(7) | C15-C16-Si1                | 112.3(15) |
| C5-C4-C3                 | 120.6(8) | C22-C21-Si2                | 112.8(15) |
| C1-C5-C6                 | 123.0(7) | C21-C22-C23                | 113.0(17) |
| C4-C5-C1                 | 116.0(6) | C22-C23-C24                | 113.8(12) |
| C4-C5-C6                 | 121.0(7) | C25-C26-C27                | 109.6(13) |
| C7-C6-C5                 | 126.9(8) | C28-C27-C26                | 118(2)    |
| C6-C7-C8                 | 128.4(8) | C27-C28-Si3                | 114(2)    |
| C9-C8-C7                 | 123.1(7) | O9-Cl1-O10                 | 101.7(8)  |
| C12-C8-C7                | 122.0(7) | O9-Cl1-O11                 | 114.6(6)  |
| C12-C8-C9                | 114.8(6) | O9-Cl1-O12                 | 115.8(7)  |
| C8-C9-C10                | 122.0(7) | O11-Cl1-O10                | 103.6(8)  |
| N2-C10-C9                | 122.2(7) | O12-Cl1-O10                | 106.4(7)  |
| N2-C11-C12               | 123.8(7) | O12-Cl1-O11                | 112.9(6)  |

<sup>1</sup>  $-x, -\frac{1}{2}+y, \frac{1}{2}-z$ ; <sup>2</sup>  $1-x, \frac{1}{2}+y, \frac{1}{2}-z$ ; <sup>3</sup>  $-1+x, \frac{1}{2}-y, -\frac{1}{2}+z$ ; <sup>4</sup>  $+x, \frac{1}{2}-y, \frac{1}{2}+z$ ; <sup>5</sup>  $-1+x, +y, +z$ ; <sup>6</sup>  $+x, \frac{1}{2}-y, -\frac{1}{2}+z$ ; <sup>7</sup>  $1+x, +y, +z$ ; <sup>8</sup>  $1+x, \frac{1}{2}-y, \frac{1}{2}+z$ ; <sup>9</sup>  $-x, \frac{1}{2}+y, \frac{1}{2}-z$ ; <sup>10</sup>  $1-x, -\frac{1}{2}+y, \frac{1}{2}-z$ ; <sup>11</sup>  $-x, 1-y, 1-z$

| D-H...A | d(D-H)/Å | d(H...A)/Å | d(D-A)/Å | D-H...A/ <sup>o</sup> | Symmetry code |
|---------|----------|------------|----------|-----------------------|---------------|
|---------|----------|------------|----------|-----------------------|---------------|



|            |      |      |           |       |                                            |
|------------|------|------|-----------|-------|--------------------------------------------|
| C3-H...O5  | 0.93 | 2.48 | 3.060(8)  | 120.2 | $1 - x, 1 - y, 1 - z$                      |
| C33-H...O6 | 0.93 | 2.59 | 3.093(7)  | 114.3 | $1 - x, -\frac{1}{2} + y, \frac{1}{2} - z$ |
| C26-H...O2 | 0.97 | 2.56 | 3.413(16) | 147.4 | $+ x, \frac{1}{2} - y, \frac{1}{2} + z$    |
